# Supplementary material for: Pituitary Hyperplasia in Severe Primary Hypothyroidism: A Case Report and Review of the Literature
Source: PubMed Central journal article supplement (PMC6614958; doi:10.1155/2019/2012546), 2019-06-25
Supplement: 2012546.f1.pdf [file 2012546.f1.pdf]

**Table 2: Case reports in Adults with Pituitary Hyperplasia and Primary Hypothyroidism**

| Year published | Author                       | Number of patients | Gender(s)    | Age    | Clinical Symptoms                                                             | Initial TSH                               | Initial PRL                   | Imaging Modality Pituitary Size                                      | Visual Deficits | Hyperprolactinemia | Comments                     |
|----------------|------------------------------|--------------------|--------------|--------|-------------------------------------------------------------------------------|-------------------------------------------|-------------------------------|----------------------------------------------------------------------|-----------------|--------------------|------------------------------|
| 1976           | Keye et al <sup>6</sup>      | 1                  | Female       | 18     | Delayed puberty, growth                                                       | 971 $\mu$ U/mL (ref <5)                   | 1110 $\mu$ l nq/mL (ref <100) | Pneumoencephalopgra, Brain angiography. Enlarged sella.              | No              | Yes                | Complete resolution          |
| 1976           | Vagenakis et al <sup>7</sup> | 2                  | Male         | 71, 64 | Lethargy, headaches; lethargy                                                 | 18 $\mu$ U/mL; 36 $\mu$ U/mL              | -                             | X ray and Tomogram. Sella volume 1920 mm <sup>3</sup> ; 2 cm x 2 cm. | In 1 case       | No                 | Pituitary failure            |
| 1978           | Jawadi et al <sup>8</sup>    | 1                  | Female       | 20     | Amenorrhea, galactorrhea                                                      | 210 ImU/mL                                | 43-77 ng/mL (ref <15)         | Pneumoencephalogram. Enlarged sella.                                 | No              | Yes                | Complete resolution          |
| 1979           | Pita et al <sup>9</sup>      | 1                  | Female       | 27     | Weight gain, fatigue, cold intolerance                                        | 295 $\mu$ U/mL (ref 0-12)                 | -                             | CT Scan. 2 cm x 1.5 cm x 4.5 cm.                                     | No              | No                 | Complete resolution          |
| 1980           | Katz et al <sup>10</sup>     | 1                  | Female       | 39     | Post surgical hypothyroidism. Visual disturbances and bitemporal hemianopsia. | 21.4 (no units available)                 | -                             | X ray and CT Scan. 2.5 cm x 2.5 cm x 2.5 cm                          | Yes             | No                 | Surgery                      |
| 1981           | Silver et al <sup>11</sup>   | 1                  | Female       | 23     | Oligomenorrhea, galactorrhea                                                  | 848 $\mu$ U/mL (ref 0-6)                  | 17 ng/dL (ref 0-20)           | CT Scan ( no pituitary size available)                               | No              | Yes                | Complete resolution          |
| 1982           | Gup et al <sup>12</sup>      | 2                  | Female; Male | 29; 64 | Oligomenorrhea, galactorrhea; Focal weakness                                  | 384 $\mu$ U/mL; 115 $\mu$ U/mL (ref <2-6) | 27 ng/dL; unknown (ref 6-20)  | CT Scan. Enlarged pituitary.                                         | No; Yes         | Yes; No            | Complete resolution; Surgery |

**Table 2: Case reports in Adults with Pituitary Hyperplasia and Primary Hypothyroidism**

| Year published | Author                            | Number of patients    | Gender(s) | Age    | Clinical Symptoms                        | Initial TSH                  | Initial PRL                        | Imaging Modality Pituitary Size                                               | Visual Deficits | Hyperprolactinemia | Comments            |
|----------------|-----------------------------------|-----------------------|-----------|--------|------------------------------------------|------------------------------|------------------------------------|-------------------------------------------------------------------------------|-----------------|--------------------|---------------------|
| 1983           | Valenta et al <sup>13</sup>       | 2                     | Female    | 29; 28 | Amenorrhea; Amenorrhea                   | 98 µU/mL; 360 µU/mL (ref <6) | 23 ng/dL; 46 ng/dL (ref 6-20)      | CT Scan. 1.1 cm; 9 mm.                                                        | No              | Yes                | Complete resolution |
| 1984           | Khalil et al <sup>14</sup>        | 1                     | Female    | 32     | Oligomenorrhea                           | 350 IU/L (ref <10)           | 51µg/L (ref 0-30)                  | CT Scan. Enlarged sella.                                                      | No              | Yes                | Surgery             |
| 1984           | Groff et al <sup>15</sup>         | 2                     | Female    | 20; 24 | Oligomenorrhea, amenorrhea; Galactorrhea | 319 µU/mL; 70 µU/mL (ref <8) | 84.2 ng/mL; 136.2 ng/mL (ref 4-35) | CT Scan. Intrasellar enhancing mass with suprasellar extension in both cases. | No              | Yes                | Complete resolution |
| 1985           | Bilaniuk et al <sup>16</sup>      | 1 adult + 2 pediatric | Female    | 30     | Amenorrhea, galactorrhea                 | 700 µU/mL (ref <40)          | 85 ng/mL (ref 0-30)                | CT Scan. 19 mm.                                                               | No              | Yes                | Complete resolution |
| 1986           | Heyburn et al <sup>17</sup>       | 1                     | Female    | 26     | Amenorrhea                               | 620-960 mU/L (ref <5)        | 1097-2464 mU/L (ref <420)          | CT Scan. 8 mm with suprasellar extension.                                     | No              | Yes                | Complete resolution |
| 1986           | Christopoulos et al <sup>18</sup> | 1                     | Female    | 42     | Galactorrhea, Headache                   | >45 mU/L                     | 1820 mU/L (ref <360)               | CT Scan. Enlarged pituitary.                                                  | No              | Yes                | Complete resolution |

**Table 2: Case reports in Adults with Pituitary Hyperplasia and Primary Hypothyroidism**

| Year published | Author                    | Number of patients              | Gender(s)        | Age              | Clinical Symptoms                                                                       | Initial TSH                                              | Initial PRL                             | Imaging Modality Pituitary Size                                                                                                                                              | Visual Deficits | Hyperprolactinemia | Comments            |
|----------------|---------------------------|---------------------------------|------------------|------------------|-----------------------------------------------------------------------------------------|----------------------------------------------------------|-----------------------------------------|------------------------------------------------------------------------------------------------------------------------------------------------------------------------------|-----------------|--------------------|---------------------|
| 1987           | Grubb et al <sup>19</sup> | 2                               | Female           | 29; 25           | Fatigue, weight gain, cold intolerance, constipation, galactorrhea, amenorrhea; Fatigue | >50 $\mu$ U/mL; >50 $\mu$ U/mL (ref 0.2-5.5)             | 36 ng/mL; 67 ng/mL (ref 3-15)           | CT Scan. Enlarged pituitary in both cases.                                                                                                                                   | No              | Yes                | Complete resolution |
| 1987           | Fujii et al <sup>20</sup> | 2 (1 patient with hypogonadism) | Female           | 39; 30           | Amenorrhea, galactorrhea; amenorrhea, galactorrhea.                                     | 732 $\mu$ U/mL; 660 $\mu$ U/mL (ref < 5.7)               | 96 ng/mL; 73.7 (ref < 18.2)             | CT Scan. Enhancing mass with suprasellar extension in all cases.                                                                                                             | No              | Yes                | Complete resolution |
| 1988           | Pioro et al <sup>21</sup> | 3                               | 2 Female, 1 Male | 24/F, 23/F, 44/M | Galactorrhea, amenorrhea; Galactorrhea, amenorrhea, infertility; Impotence              | 179 $\mu$ U/mL; 1.9 $\mu$ U/mL; 233 $\mu$ U/mL (ref <10) | 73 ng/mL; 68 ng/mL; 23 ng/mL (ref 0-30) | Skull X-ray, Angiogram suggests pituitary "microadenoma"; Skull Tomogram shows thinning and expansion of sella; CT Scan shows intrasellar mass with suprasellar enlargement. | No              | Yes (in 2 cases)   | Surgery             |

**Table 2: Case reports in Adults with Pituitary Hyperplasia and Primary Hypothyroidism**

| Year published | Author                       | Number of patients         | Gender(s)        | Age              | Clinical Symptoms                                              | Initial TSH                                | Initial PRL                                         | Imaging Modality Pituitary Size                            | Visual Deficits | Hyperprolactinemia | Comments                                            |
|----------------|------------------------------|----------------------------|------------------|------------------|----------------------------------------------------------------|--------------------------------------------|-----------------------------------------------------|------------------------------------------------------------|-----------------|--------------------|-----------------------------------------------------|
| 1989           | Ahmed et al <sup>22</sup>    | 5 (3 adults + 2 pediatric) | Female           | 19; 27; 39       | Primary amenorrhea; Secondary amenorrhea; Secondary amenorrhea | 470 mU/L; 439 mU/L; 230 mU/L (ref 1.1-7.2) | 69 µg/L; 59 µg/L; 143 µg/L (ref 1.3-20.8)           | CT Scan. Suprasellar tumor in all cases.                   | No              | Yes                | Complete resolution                                 |
| 1990           | Hutchins et al <sup>23</sup> | 1                          | Female           | 29               | Galactorrhea, amenorrhea, cold intolerance, dry skin           | 450 µIU/mL (ref 0-10)                      | 46.5 µg/L (ref 0-13.8)                              | MRI. 14 mm.                                                | No              | Yes                | Complete resolution                                 |
| 1990           | Chan et al <sup>24</sup>     | 3                          | 2 Female, 1 Male | 24/F, 33/F, 61/M | Menorrhagia; Amenorrhea; Galactorrhea; Bitemporal hemianopsia  | 61 mU/L; 9.6 mU/L; 32.6 mU/L (ref 0.5-5)   | 1750 mU/L; 520 mU/L (ref <520); 661 mU/L (ref <290) | CT Scan. Pituitary enlargement with suprasellar extension. | Yes in 1 case   | Yes                | Surgery in one case; complete resolution in 2 cases |
| 1992           | Fulcher et al <sup>25</sup>  | 1                          | Male             | 23               | Short stature, fatigue                                         | 586 µIU/mL (ref <4)                        | -                                                   | MRI. Enlarged pituitary.                                   | Yes             | No                 | Complete resolution                                 |
| 1996           | Wolansky et al <sup>26</sup> | 1                          | Female           | 27               | Amenorrhea, galactorrhea                                       | 283 µIU/mL (ref 0-3)                       | 43 ng/mL (ref 0-20)                                 | CT Scan, MRI. 17 mm.                                       | No              | Yes                | Complete resolution                                 |
| 1997           | Sarlis et al <sup>27</sup>   | 1                          | Female           | 26               | Post radioactive iodine ablation                               | 563.3 mU/L (ref 0.4-4.4)                   | -                                                   | MRI. Symmetric enlargement 12 mm in height.                | No              | No                 | Complete resolution                                 |

**Table 2: Case reports in Adults with Pituitary Hyperplasia and Primary Hypothyroidism**

| Year published | Author                         | Number of patients       | Gender(s) | Age | Clinical Symptoms                      | Initial TSH             | Initial PRL              | Imaging Modality Pituitary Size                                                  | Visual Deficits | Hyperprolactinemia | Comments                    |
|----------------|--------------------------------|--------------------------|-----------|-----|----------------------------------------|-------------------------|--------------------------|----------------------------------------------------------------------------------|-----------------|--------------------|-----------------------------|
| 1997           | Ozbey et al <sup>28</sup>      | 1                        | Female    | 32  | Amenorrhea, galactorrhea               | 97 mU/mL (ref 04.-4)    | 77 µg/mL (ref 2-20)      | MRI. 17 mm x 15 mm.                                                              | No              | Yes                | Complete resolution         |
| 1999           | Alkhani et al <sup>29</sup>    | 1                        | Female    | 51  | Headache, sensory loss, motor symptoms | >100 mU/L (ref 0.4-5.5) | 90 ng/L (ref 0-25)       | MRI. 1.6 cm x 1.2 cm x 1 cm homogeneously enhancing mass.                        | No              | Yes                | Surgery                     |
| 1999           | Young et al <sup>30</sup>      | 3 (2 pediatric+ 1 adult) | Female    | 25  | Galactorrhea, Syncope                  | 881. mU/L (ref 0.4-6)   | 48.3 ng/mL (ref 3-24)    | MRI. Enlarged pituitary.                                                         | No              | Yes                | Biopsy, complete resolution |
| 1999           | Yamagishi et al <sup>31</sup>  | 1                        | Female    | 18  | Malaise                                | 431.7 µU/mL (ref 0.4-5) | -                        | MRI. 2 cm x 2 cm x 1 cm homogeneously enhancing mass with suprasellar extension. | No              | No                 | Complete resolution         |
| 2000           | Nicholas et al <sup>32</sup>   | 1                        | Female    | 33  | Fatigue, amenorrhea, galactorrhea      | 677 mU/mL (ref 0.4-5.5) | 114 ng/mL (ref 1.3-24.2) | MRI. Pituitary enlargement.                                                      | No              | Yes                | Complete resolution         |
| 2000           | Manocha et al <sup>33</sup>    | 1                        | Male      | 22  | Headache                               | 150 µU/L                | -                        | CT Scan 1.1 cm x 1.1 cm x 1.2 cm.                                                | No              | No                 | Complete resolution         |
| 2003           | Hoogenberg et al <sup>34</sup> | 1                        | Male      | 51  | Hypothyroidism                         | 120 mU/L                | 580 mU/L (ref 50-200)    | MRI. 12 mm with normal gadolinium distribution.                                  | -               | Yes                | Complete resolution         |

**Table 2: Case reports in Adults with Pituitary Hyperplasia and Primary Hypothyroidism**

| Year published | Author                      | Number of patients | Gender(s)           | Age   | Clinical Symptoms         | Initial TSH                       | Initial PRL                         | Imaging Modality Pituitary Size                         | Visual Deficits    | Hyperprolactinemia            | Comments                  |
|----------------|-----------------------------|--------------------|---------------------|-------|---------------------------|-----------------------------------|-------------------------------------|---------------------------------------------------------|--------------------|-------------------------------|---------------------------|
| 2004           | Kroese et al <sup>35</sup>  | 1                  | Female              | 36    | Amenorrhea, galactorrhea  | >75 mU/L (ref 0.4-4)              | 103 g/L (ref 0-20)                  | MRI. 14 mm x 20 mm x 12 mm with suprasellar extension.  | No                 | Yes                           | Complete resolution       |
| 2005           | Joshi et al <sup>36</sup>   | 1                  | Female              | 28    | Medication non-compliance | 177 mIU/ml                        | -                                   | MRI. 1.2 cm with suprasellar extension.                 | No                 | No                            | Complete resolution       |
| 2006           | Khawaja et al <sup>37</sup> | 28 (9 pediatric)   | 25 Females, 3 males | 19-65 | Variable                  | 50-4191 $\mu$ U/mL                | 7-100 ng/mL                         | MRI. 312 mm <sup>3</sup> - 1567 mm <sup>3</sup> .       | Yes in 2 patients. | Yes (in some pediatric cases) | Resolution in most cases. |
| 2011           | Passeri et al <sup>38</sup> | 1                  | Female              | 23    | Fatigue, Polymenorrhea    | 1578 $\mu$ U/mL                   | 113 ng/mL                           | MRI. 23 mm x 23 mm x 10 mm sellar and suprasellar mass. | No                 | Yes                           | Complete resolution       |
| 2011           | Agrawal et al <sup>39</sup> | 1                  | Female              | 22    | Headache, fatigue         | 150 $\mu$ U/dL (ref 0.3-5.5)      | 35 IU/dL                            | CT Scan, MRI. Diffuse enlargement.                      | No                 | No                            | No follow up imaging      |
| 2012           | Han et al <sup>40</sup>     | 15                 | 6 Males, 9 Females  | 13-46 | Variable                  | 85-190 $\mu$ U/mL (ref 0.38-4.34) | 50.46-180.75 ng/mL (ref 3.34-26.72) | CT Scan, MRI. Variable size.                            | No                 | Yes                           | Complete resolution       |
| 2012           | Rajput et al <sup>41</sup>  | 1                  | Female              | 32    | Amenorrhea                | 660.18 mIU/ml (ref 0.35-5.5)      | 101.8 ng/ml (ref 3.1-25)            | MRI. 19 mm x 12.5 mm x 12 mm.                           | No                 | Yes                           | Complete resolution       |

**Table 2: Case reports in Adults with Pituitary Hyperplasia and Primary Hypothyroidism**

| Year published | Author                      | Number of patients        | Gender(s) | Age | Clinical Symptoms         | Initial TSH                  | Initial PRL                  | Imaging Modality Pituitary Size                                                                   | Visual Deficits | Hyperprolactinemia | Comments            |
|----------------|-----------------------------|---------------------------|-----------|-----|---------------------------|------------------------------|------------------------------|---------------------------------------------------------------------------------------------------|-----------------|--------------------|---------------------|
| 2012           | Eiland et al <sup>42</sup>  | 1                         | Female    | 23  | Cold intolerance, fatigue | 1398 IU/mL (ref 0.34–5.6)    | 1260.8pM/L (ref 43.5–1043.5) | MRI. Enlarged pituitary with homogenous enhancement.                                              | Yes             | No                 | Complete resolution |
| 2012           | Kumar et al <sup>43</sup>   | 1                         | Male      | 22  | Acromegaly                | 122.2 mIU/l (normal 0.3–4.5) | 24 ng/ml (ref 0–15)          | MRI. 1.6 cm x 1.1 cm pituitary mass with suprasellar extension.                                   | No              | No                 | Complete resolution |
| 2012           | Dutta et al <sup>44</sup>   | 1                         | Male      | 27  | Short stature, fatigue    | >50 µU/mL                    | -                            | CT Scan, MRI. Empty sella.                                                                        | No              | No                 | Pituitary failure   |
| 2015           | Neves et al <sup>45</sup>   | 1                         | Female    | 21  | Amenorrhea, galactorrhea  | >500 mIU/L (0.4–4.3)         | 1000 mIU/L (0–700)           | MRI. Homogenously enhancing 19 mm x 17 mm x 12 mm mass with suprasellar and parasellar extension. | No              | Yes                | Complete resolution |
| 2015           | De Sousa et al <sup>2</sup> | 4 (1 with hypothyroidism) | Female    | 19  | Abdominal pain            | 566 mIU/L (ref 0.4–3.5)      | 782 mIU/L (85–500)           | MRI. 13 mm with suprasellar extension.                                                            | No              | Yes                | Complete resolution |
| 2015           | Moumen et al <sup>46</sup>  | 1                         | Male      | 35  | Headache                  | >100 µIU/mL (ref 0.34–5.6)   | 22.5 ng/mL (ref 2.64–13.13)  | MRI. 12.5 mm.                                                                                     | Yes             | No                 | Complete resolution |

**Table 2: Case reports in Adults with Pituitary Hyperplasia and Primary Hypothyroidism**

| Year published | Author                          | Number of patients | Gender(s) | Age | Clinical Symptoms       | Initial TSH                     | Initial PRL              | Imaging Modality Pituitary Size              | Visual Deficits | Hyperprolactinemia | Comments            |
|----------------|---------------------------------|--------------------|-----------|-----|-------------------------|---------------------------------|--------------------------|----------------------------------------------|-----------------|--------------------|---------------------|
| 2015           | Siddiqi et al <sup>47</sup>     | 1                  | Female    | 18  | Decreased visual acuity | >100 $\mu$ IU/mL (ref 0.27-4.2) | 1134 mIU/mL (ref 86-324) | MRI. Sellar mass with suprasellar extension. | Yes             | Yes                | Complete resolution |
| 2016           | Pappy et al <sup>48</sup>       | 1                  | Female    | 63  | Abnormal MRI            | 147 $\mu$ IU/mL (ref 0.4-4.5)   | -                        | MRI. 5 mm hypodense lesion.                  | No              | No                 | Complete resolution |
| 2016           | Ansari et al <sup>49</sup>      | 1                  | Female    | 67  | Loss of consciousness   | 863.3 mIU/L (ref 0.2-4.2)       | 3234 mIU/L (ref 102-496) | MRI. 1.9 cm x 1.6 cm x 1.8 cm.               | No              | No                 | Complete resolution |
| 2017           | Chakraborty et al <sup>50</sup> | 1                  | Male      | 64  | Acromegaly              | >75 $\mu$ IU/mL                 | 33.4 ng/mL               | MRI. Enlarged pituitary.                     | No              | No                 | Complete resolution |

Legend: TSH - Thyroid stimulating hormone; PRL - Prolactin; CT - Computed tomography; MRI - Magnetic resonance imaging
